# Supplementary material for: Identifying DNA mismatches at single-nucleotide resolution by probing individual surface potentials of DNA-capped nanoparticles
Source: Royal Society of Chemistry journal article supplement (doi:10.1039/c7nr05250b), 2017-11-06
Supplement: c7nr05250b1.pdf [file c7nr05250b1.pdf]

**Electronic Supporting information for:**

# **Identifying DNA Mismatches at Single-Nucleotide Resolution by Probing Individual Surface Potentials of DNA-Capped Nanoparticles**

Hyungbeen Lee, ‡<sup>a</sup> Sang Won Lee, ‡<sup>b</sup> Gyudo Lee, ‡<sup>b,c</sup> Wonseok Lee,<sup>a</sup> Kihwan Nam,<sup>d</sup> Jeong Hoon Lee,<sup>e</sup> Kyo Seon Hwang,<sup>f</sup> Jaemoon Yang,<sup>g</sup> Hyeyoung Lee,<sup>h</sup> Sangsig Kim,<sup>i</sup> Sang Woo Lee,<sup>a</sup> and Dae Sung Yoon\*<sup>b</sup>

<sup>a</sup> *Department of Biomedical Engineering, Yonsei University, Wonju 26493, Korea*

<sup>b</sup> *School of Biomedical Engineering, Korea University, Seoul 02841, Korea*

<sup>c</sup> *School of Public Health, Harvard University, Boston, Massachusetts 02115, United States*

<sup>d</sup> *Center for Bionics, Korea Institute of Science and Technology (KIST), Seoul 02792, Korea*

<sup>e</sup> *Department of Electrical Engineering, Kwangwoon University, Seoul 01897, Korea*

<sup>f</sup> *Department of Clinical Pharmacology and Therapeutics, College of Medicine, Kyung Hee University, Seoul 02447, Korea*

<sup>g</sup> *Department of Radiology, Yonsei University College of Medicine, Seoul 03722, Korea*

<sup>h</sup> *Department of Biomedical Laboratory Science, Yonsei University, Wonju 26493, Korea*

<sup>i</sup> *Department of Electrical Engineering, Korea University, Seoul 02841, Korea*

*‡These authors contributed equally to this work.*

*Corresponding author*

*E-mail address: dsyoon@korea.ac.kr*

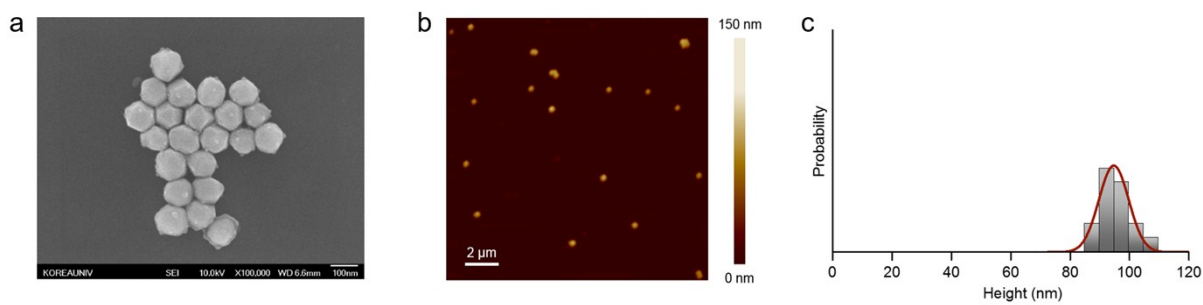

**Fig. S1** SEM and AFM analysis of the bare GNP (~100 nm in diameter). (a) SEM image of GNP (100 nm in diameter), (b) An AFM topography image (scan size: 10 μm × 10 μm) and (c) the corresponding height distribution of the bare GNP, extracted from the topography image (b).

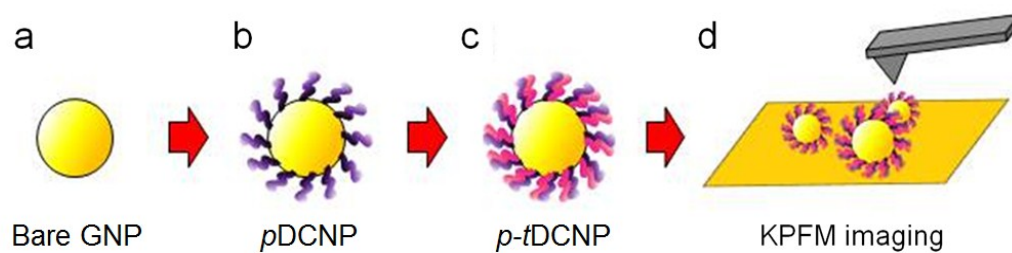

**Fig. S2** A schematic describing our experimental procedure. (a) The bare GNP (100 nm, Sigma-Aldrich) was diluted to 0.1 mM in PBS with  $3.45 - 4.22 \times 10^9$  particles in 1 mL. (b) The *p*DNAs (16 mer) are immobilized on the bare GNP, which is called *p*DCNP. (c) The *t*DNAs with 1 to 5 nucleotide mismatches are hybridized with the *p*DCNP. (d) Topography and surface potential images of each sample are obtained by KPFM.

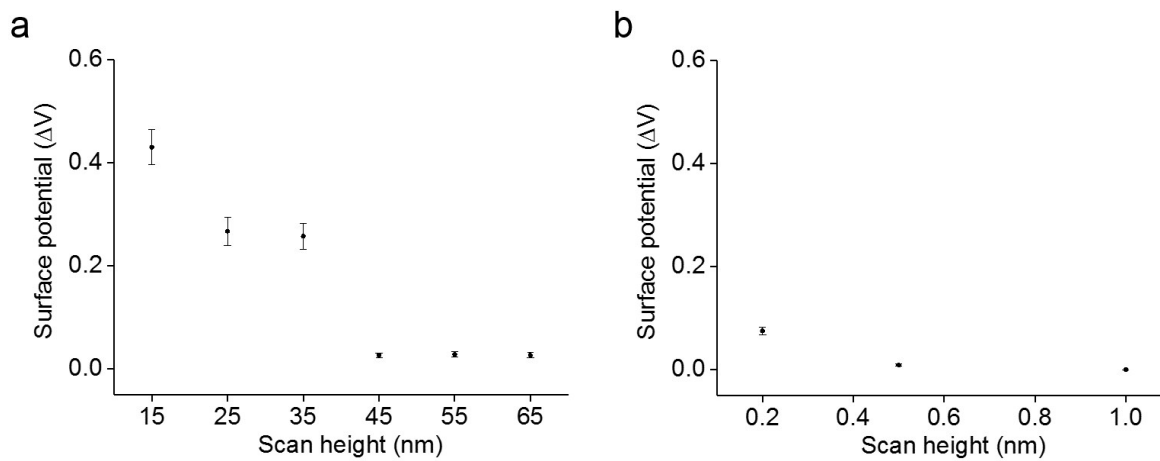

**Fig. S3** Optimization of KPFM imaging of the bare GNP. The measured surface potentials of the bare GNP with different lift scan heights (a) and with different drive amplitudes (b).

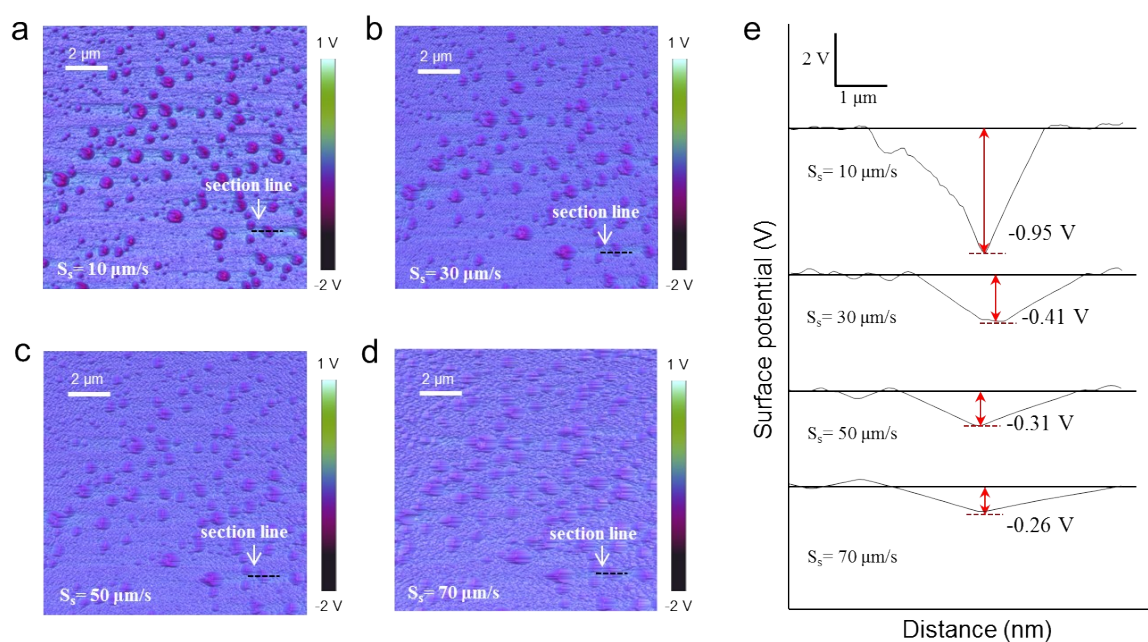

**Fig. S4** Surface potential images of the *p*DCNPs with respect to four different scanning speeds. The surface potential mapping images by KPFM (scan size:  $10\ \mu\text{m} \times 10\ \mu\text{m}$ ) were obtained at the scan speeds of  $10\ \mu\text{m/s}$  (a),  $30\ \mu\text{m/s}$  (b),  $50\ \mu\text{m/s}$  (c), and  $70\ \mu\text{m/s}$  (d), respectively. (e) Cross-sectional views of the surface potentials measured at the different scan speeds, obtained by performing line scans (black dot line) in each image.

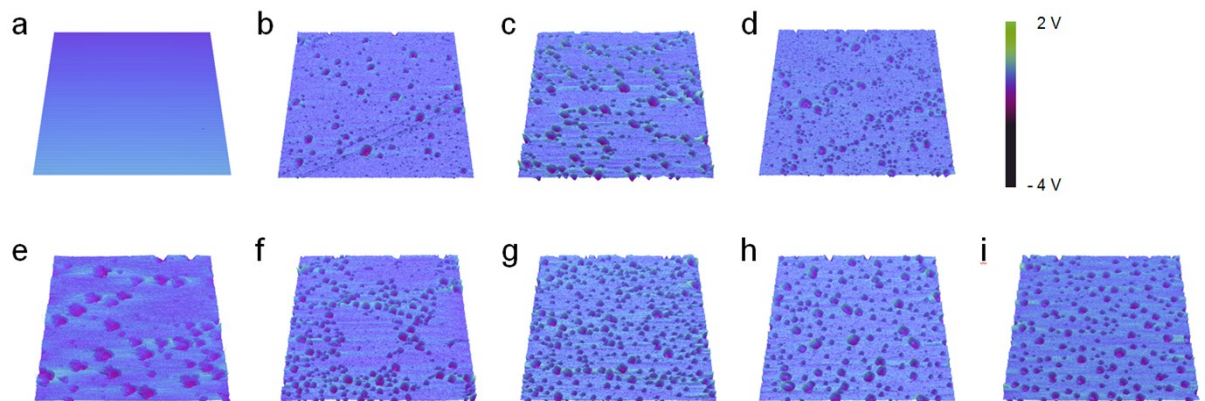

**Fig. S5** Top view 3D surface potential images of all the samples. (a-i) 3D images ( $10 \times 10 \mu\text{m}^2$ ) of all the samples with top-view point: (a) the bare GNP (100 nm), (b) the  $p$ DCNP, (c) the  $p$ - $c$ DCNP, (d) the  $p$ - $nc$ DCNP, (e) the  $p$ - $\chi_1$ DCNP, (f) the  $p$ - $\chi_2$ DCNP, (g) the  $p$ - $\chi_3$ DCNP, (h) the  $p$ - $\chi_4$ DCNP, and (i) the  $p$ - $\chi_5$ DCNPs.

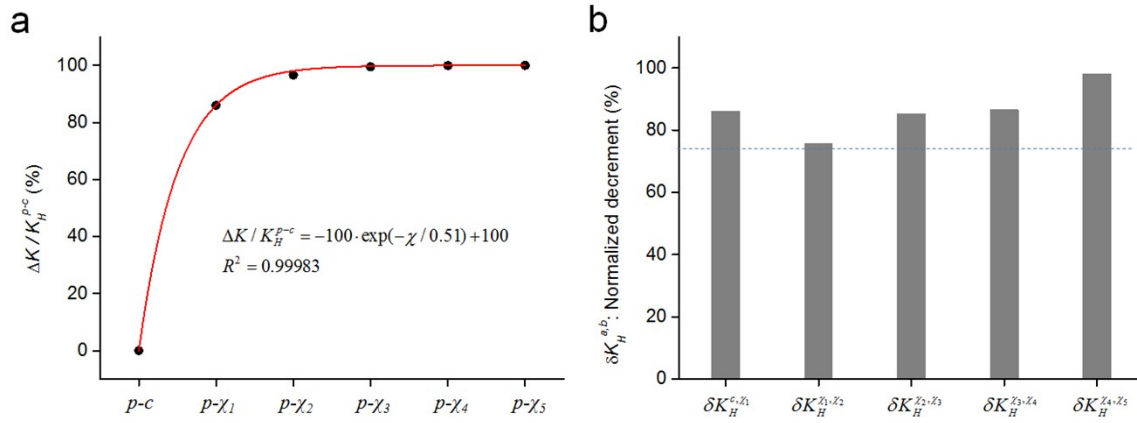

**Fig. S6** Comparison between the equilibrium constants for DNA hybridization ( $K_H$ ). (a) Relative equilibrium constant of each case in comparison with the  $K_H$  of the  $p$ -cDNA, (b) Normalized decrement (between two neighboring cases) of the equilibrium constants for DNA hybridization of 1 to 5 mutations. For instance, normalized decrement between  $p$ -aDNA and  $p$ -bDNA is given by:

$$\delta K_H^{a,b} (\%) = \frac{K_H^a - K_H^b}{K_H^a} \times 100$$

Each difference between two neighboring values of the  $K_H$  was at least 75%, implying that this system has a capacity for discriminating between any two similar mutations and performing gene analysis with high accuracy and reliability.

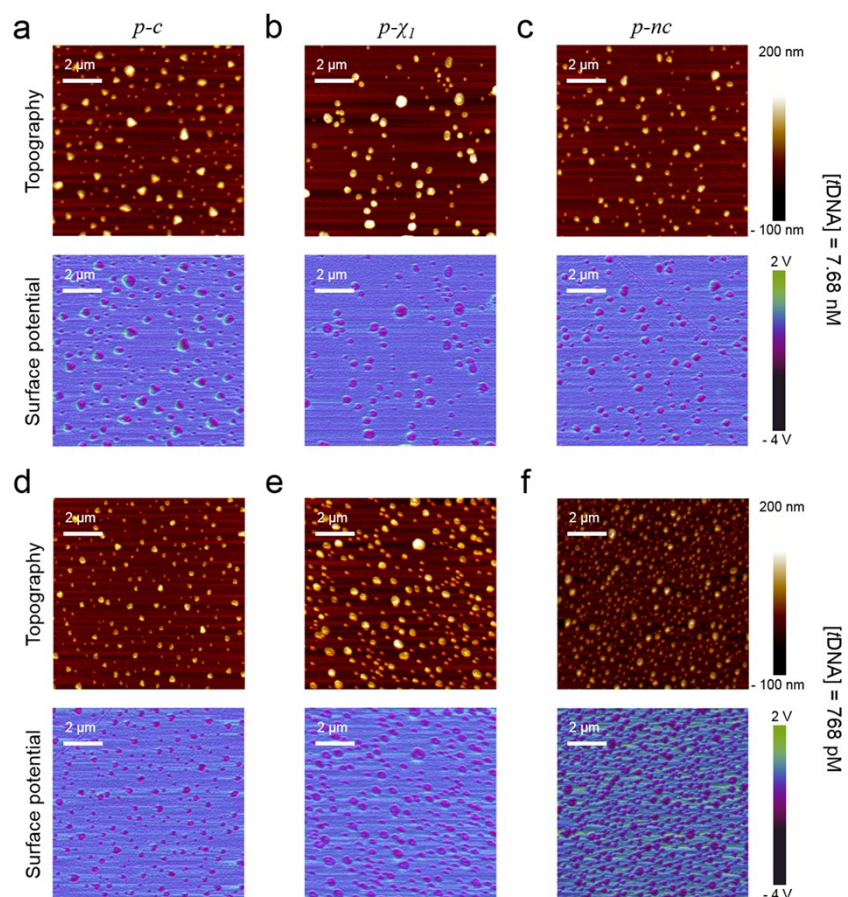

**Fig. S7** KPFM analyses at lower concentrations of *t*DNA (7.68 nM and 768 pM). (a-f) Topography and surface potential images ( $10 \times 10 \mu\text{m}^2$ ) of the DCNPs: (a) *p-c*DCNP at 7.68 nM *c*DNA, (b) *p- $\chi_1$* DCNP at 7.68 nM  $\chi_1$ DNA, (c) *p-nc*DCNP at 7.68 nM *nc*DNA, (d) *p-c*DCNP at 768 pM *c*DNA, (e) *p- $\chi_1$* DCNP at 768 pM  $\chi_1$ DNA, (f) *p-nc*DCNP at 768 pM *nc*DNA, respectively.



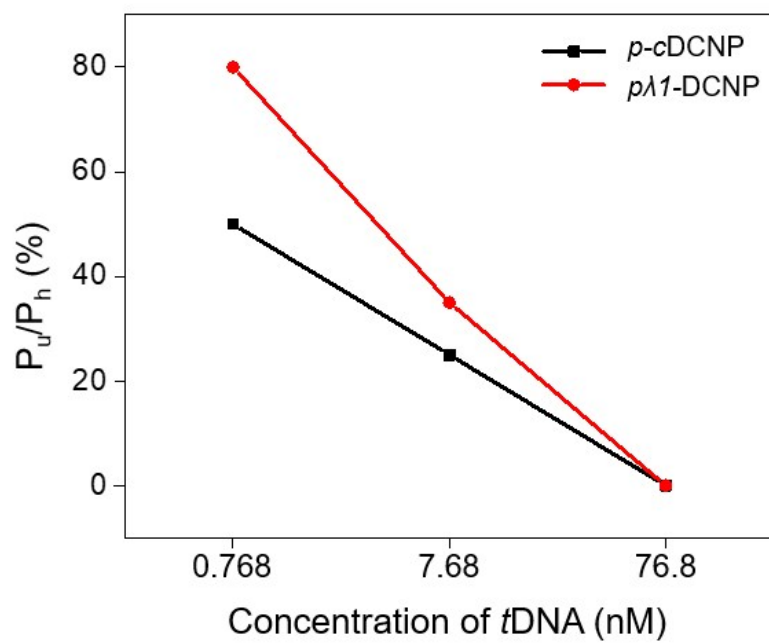

**Fig. S8** Population ratio ( $P_u/P_h$ ) of the unbound to the hybridized DCNPs with concentration of *t*DNA

|                                 | $\phi_{pDNA}$ | $\Phi$ | $\Phi_{ideal}$<br>( $=2 \phi_{pDNA}$ ) | $\phi'_{pDNA}$ | $\phi'_{p-tDNA}$ | $K_H$    |
|---------------------------------|---------------|--------|----------------------------------------|----------------|------------------|----------|
| <i>p-cDNA</i>                   | 0.743         | 1.455  | 1.490                                  | 0.035          | 1.420            | 1502.029 |
| <i>p-<math>\chi_1</math>DNA</i> | 0.743         | 1.410  | 1.490                                  | 0.080          | 1.330            | 201.089  |
| <i>p-<math>\chi_2</math>DNA</i> | 0.743         | 1.334  | 1.490                                  | 0.156          | 1.177            | 51.262   |
| <i>p-<math>\chi_3</math>DNA</i> | 0.743         | 1.156  | 1.490                                  | 0.334          | 0.822            | 7.612    |
| <i>p-<math>\chi_4</math>DNA</i> | 0.743         | 0.912  | 1.490                                  | 0.578          | 0.335            | 1.031    |
| <i>p-<math>\chi_5</math>DNA</i> | 0.743         | 0.748  | 1.490                                  | 0.742          | 0.006            | 0.019    |
| <i>p-ncDNA</i>                  | 0.743         | 0.747  | 1.490                                  | 0.743          | 0.005            | 0.017    |

**Table S1.** Summary of the surface potentials of the *p-t*DCNPs, and the calculated equilibrium constants for DNA hybridization ( $K_H$ ). Table shows the results obtained from the average surface potentials of each *p-t*DCNP case (that is, from the *p-cDNA* to the *p-ncDNA*).  $\phi_{pDNA}$  indicates the measured surface potential of the *p*DCNPs.  $\Phi$  is a total average potential of each *p-t*DCNP case, measured by KPFM, and  $\Phi_{ideal}$  is an ideal case of the  $\Phi$  which has double charge of the *p*DNA surface potential. After hybridization,  $\phi'_{pDNA}$  and  $\phi'_{dsDNA}$  reflect the surface potentials of the remaining *p*DNA and the dsDNA (hybridized *p-t*DNA). Based on the model (Eq. 3) we calculated the  $K_H$  between the *p*DNA and the *t*DNA.

|         |                | <i>p</i> -cDNA         |                 | <i>p</i> - $\chi_t$ DNA |                 | <i>p</i> -ncDNA        |                 |
|---------|----------------|------------------------|-----------------|-------------------------|-----------------|------------------------|-----------------|
|         |                | Average ( $\Delta V$ ) | Probability (%) | Average ( $\Delta V$ )  | Probability (%) | Average ( $\Delta V$ ) | Probability (%) |
| 76.8 nM | $\phi_{ssDNA}$ | 1.455                  | 100.000         | 1.410                   | 100.000         | -                      | -               |
|         | $\phi_{dsDNA}$ | -                      | -               | -                       | -               | 0.743                  | 100.000         |
| 7.68 nM | $\phi_{ssDNA}$ | 1.398                  | 76.171          | 1.320                   | 64.151          | -                      | -               |
|         | $\phi_{dsDNA}$ | 0.760                  | 26.829          | 0.772                   | 35.849          | 0.741                  | 100.000         |
| 768 pM  | $\phi_{ssDNA}$ | 1.325                  | 51.667          | 1.335                   | 18.667          | -                      | -               |
|         | $\phi_{dsDNA}$ | 0.765                  | 48.333          | 0.762                   | 81.333          | 0.752                  | 100.000         |

**Table S2.** Summary of the bimodal distributions in surface potential of the DCNPs at low *t*DNA concentration, and their probability between two different states of each DCNP case. Herein, the  $\phi_{ssDNA}$  represents an average surface potential of the *p*DCNP left not hybridized. The  $\phi_{dsDNA}$  is an average surface potential of the *p*-*t*DCNP, the hybridization of which is completed.
